# Supplementary material
Source: PubMed Central journal article supplement (PMC8842851)
Supplement: NIHMS1657997-supplement-1.pdf [file NIHMS1657997-supplement-1.pdf]

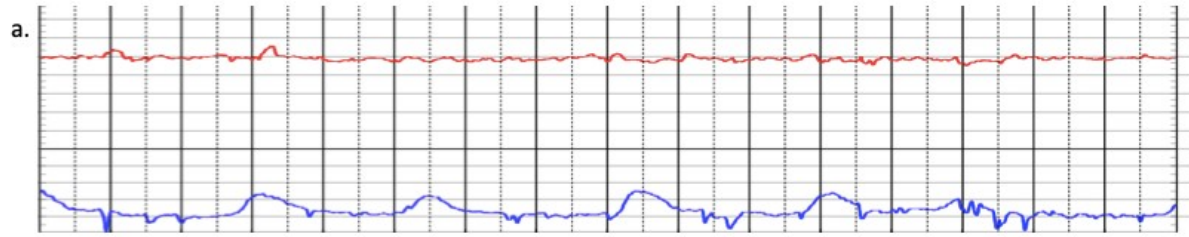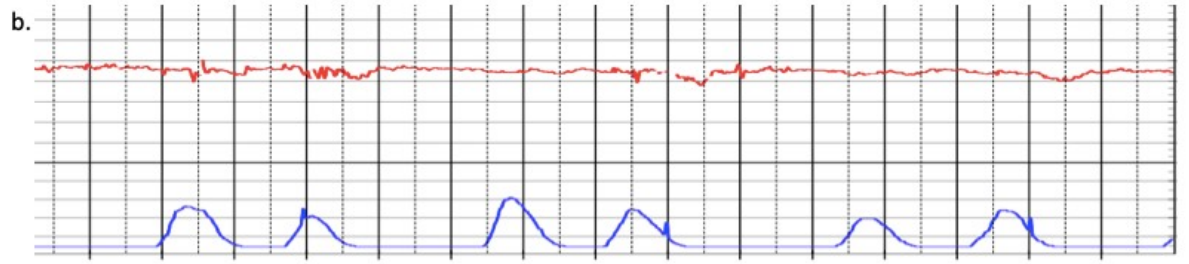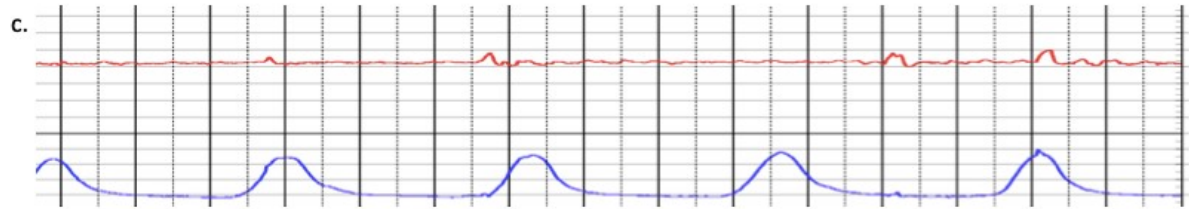

Journal F.

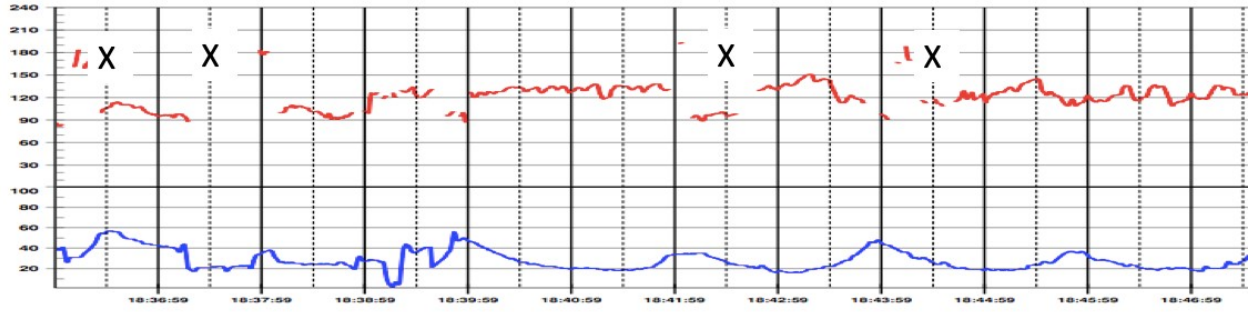

Journal Pre-proof

### Interpretable Minutes in Labor (% of Total Labor)

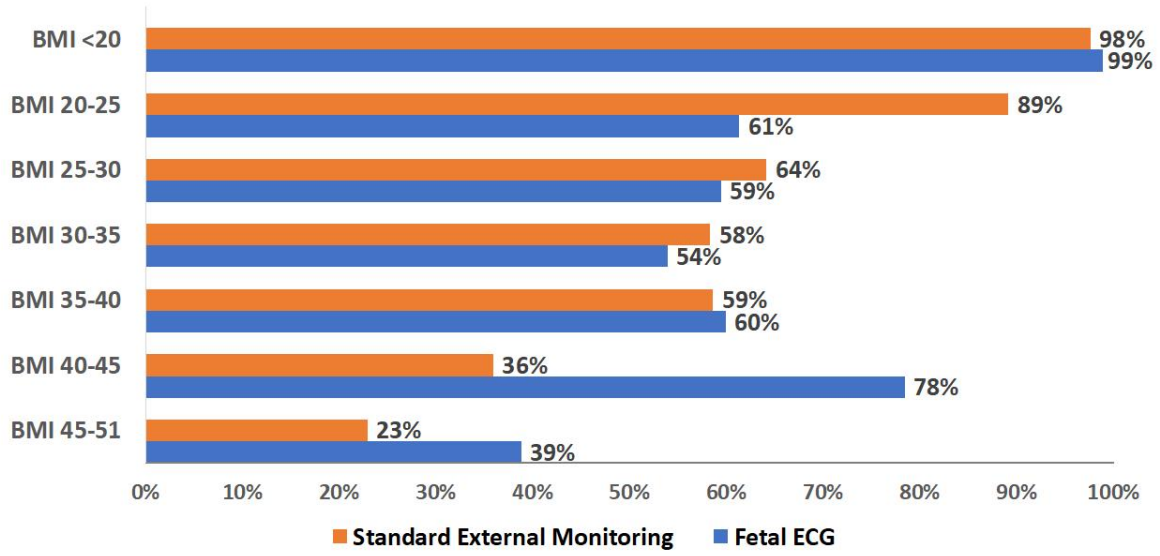

Journal Pre

Interpretable minutes (% while on device)

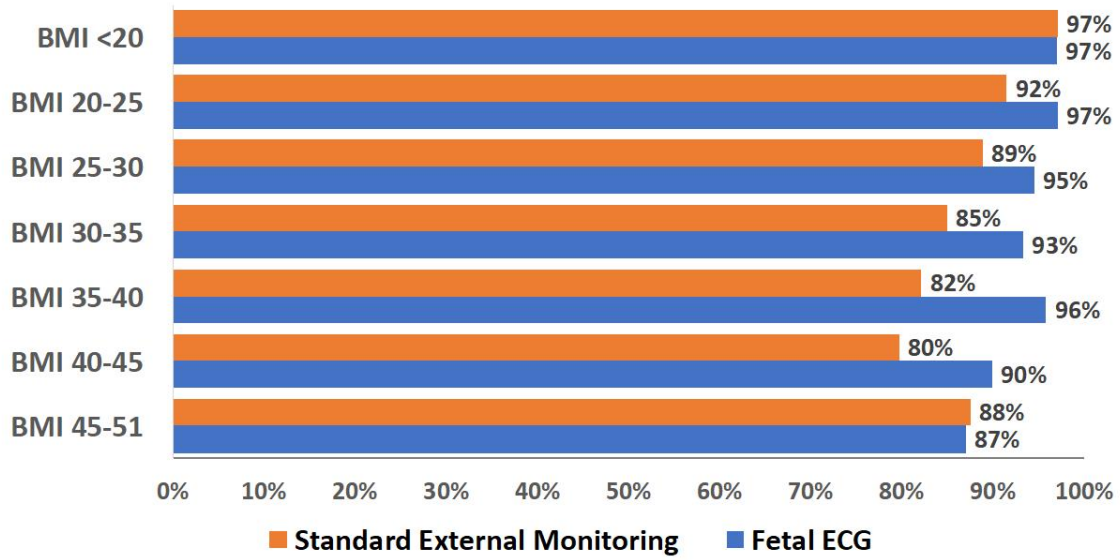

Journal Pre

### Nursing Satisfaction Survey

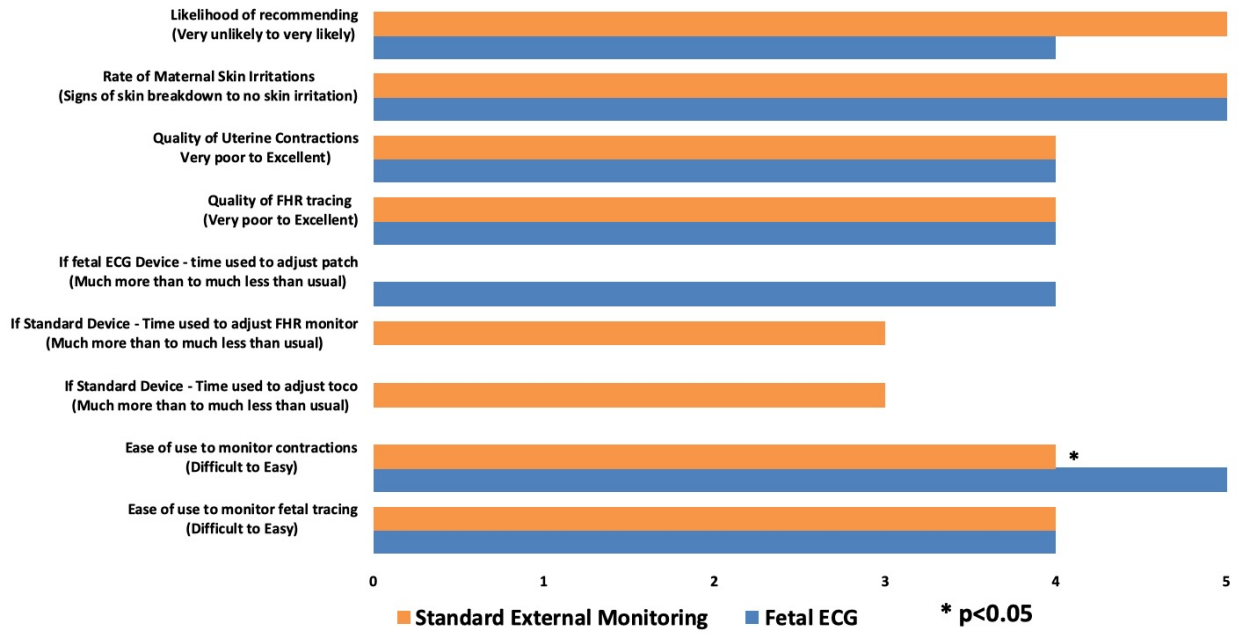

Journal Pre

### Provider Satisfaction Survey

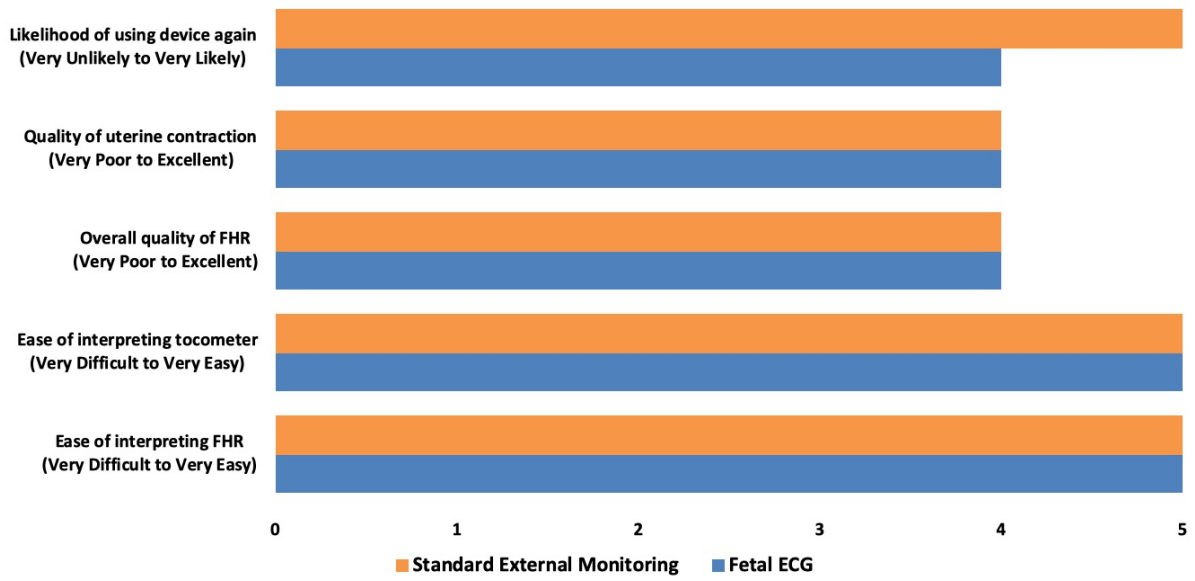

Journal Pre-proof
